# Supplementary material for: Subtyping of microsatellite instability-high colorectal cancer
Source: PubMed Central journal article supplement (PMC6647262; doi:10.1186/s12964-019-0397-4), 2019-07-22
Supplement: 12964_2019_397_MOESM2_ESM.pdf [file 12964_2019_397_MOESM2_ESM.pdf]

rank = 2

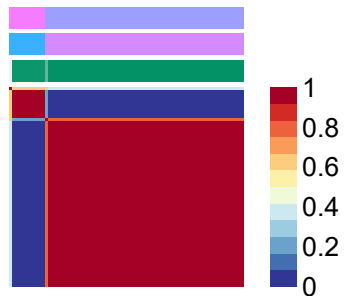

basis

- 1
- 2

consensus

- 1
- 2

rank = 3

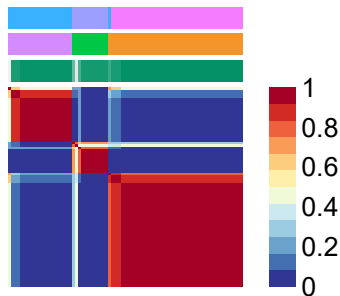

basis

- 1
- 2
- 3

consensus

- 1
- 2
- 3

rank = 4

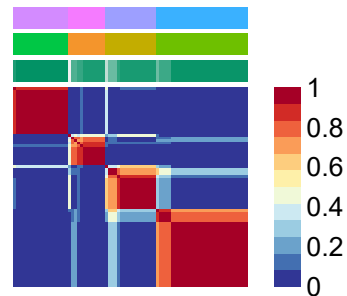

basis

- 1
- 2
- 3
- 4

consensus

- 1
- 2
- 3
- 4

rank = 5

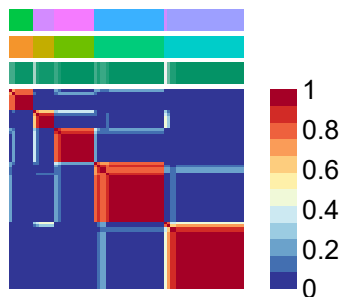

silhouette

- 1
- 0.33

basis

- 1
- 2
- 3
- 4
- 5

rank = 6

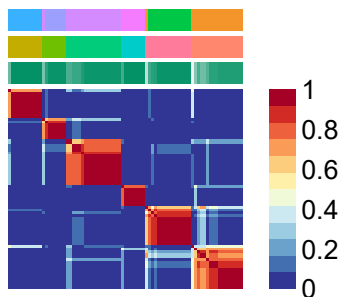

silhouette

- 0.99
- 0.01

basis

- 1
- 2
- 3
- 4
- 5
- 6

silhouette

- 0.99
- 0.06

Figure S1 Clustering of 77 MSI-H CRCs in GSE39582 by NMF. Correlation matrix heatmaps correspond to rank 2 to 6.
