# Supplementary material for: Subtyping of microsatellite instability-high colorectal cancer
Source: PubMed Central journal article supplement (PMC6647262; doi:10.1186/s12964-019-0397-4), 2019-07-22
Supplement: 12964_2019_397_MOESM3_ESM.pdf [file 12964_2019_397_MOESM3_ESM.pdf]

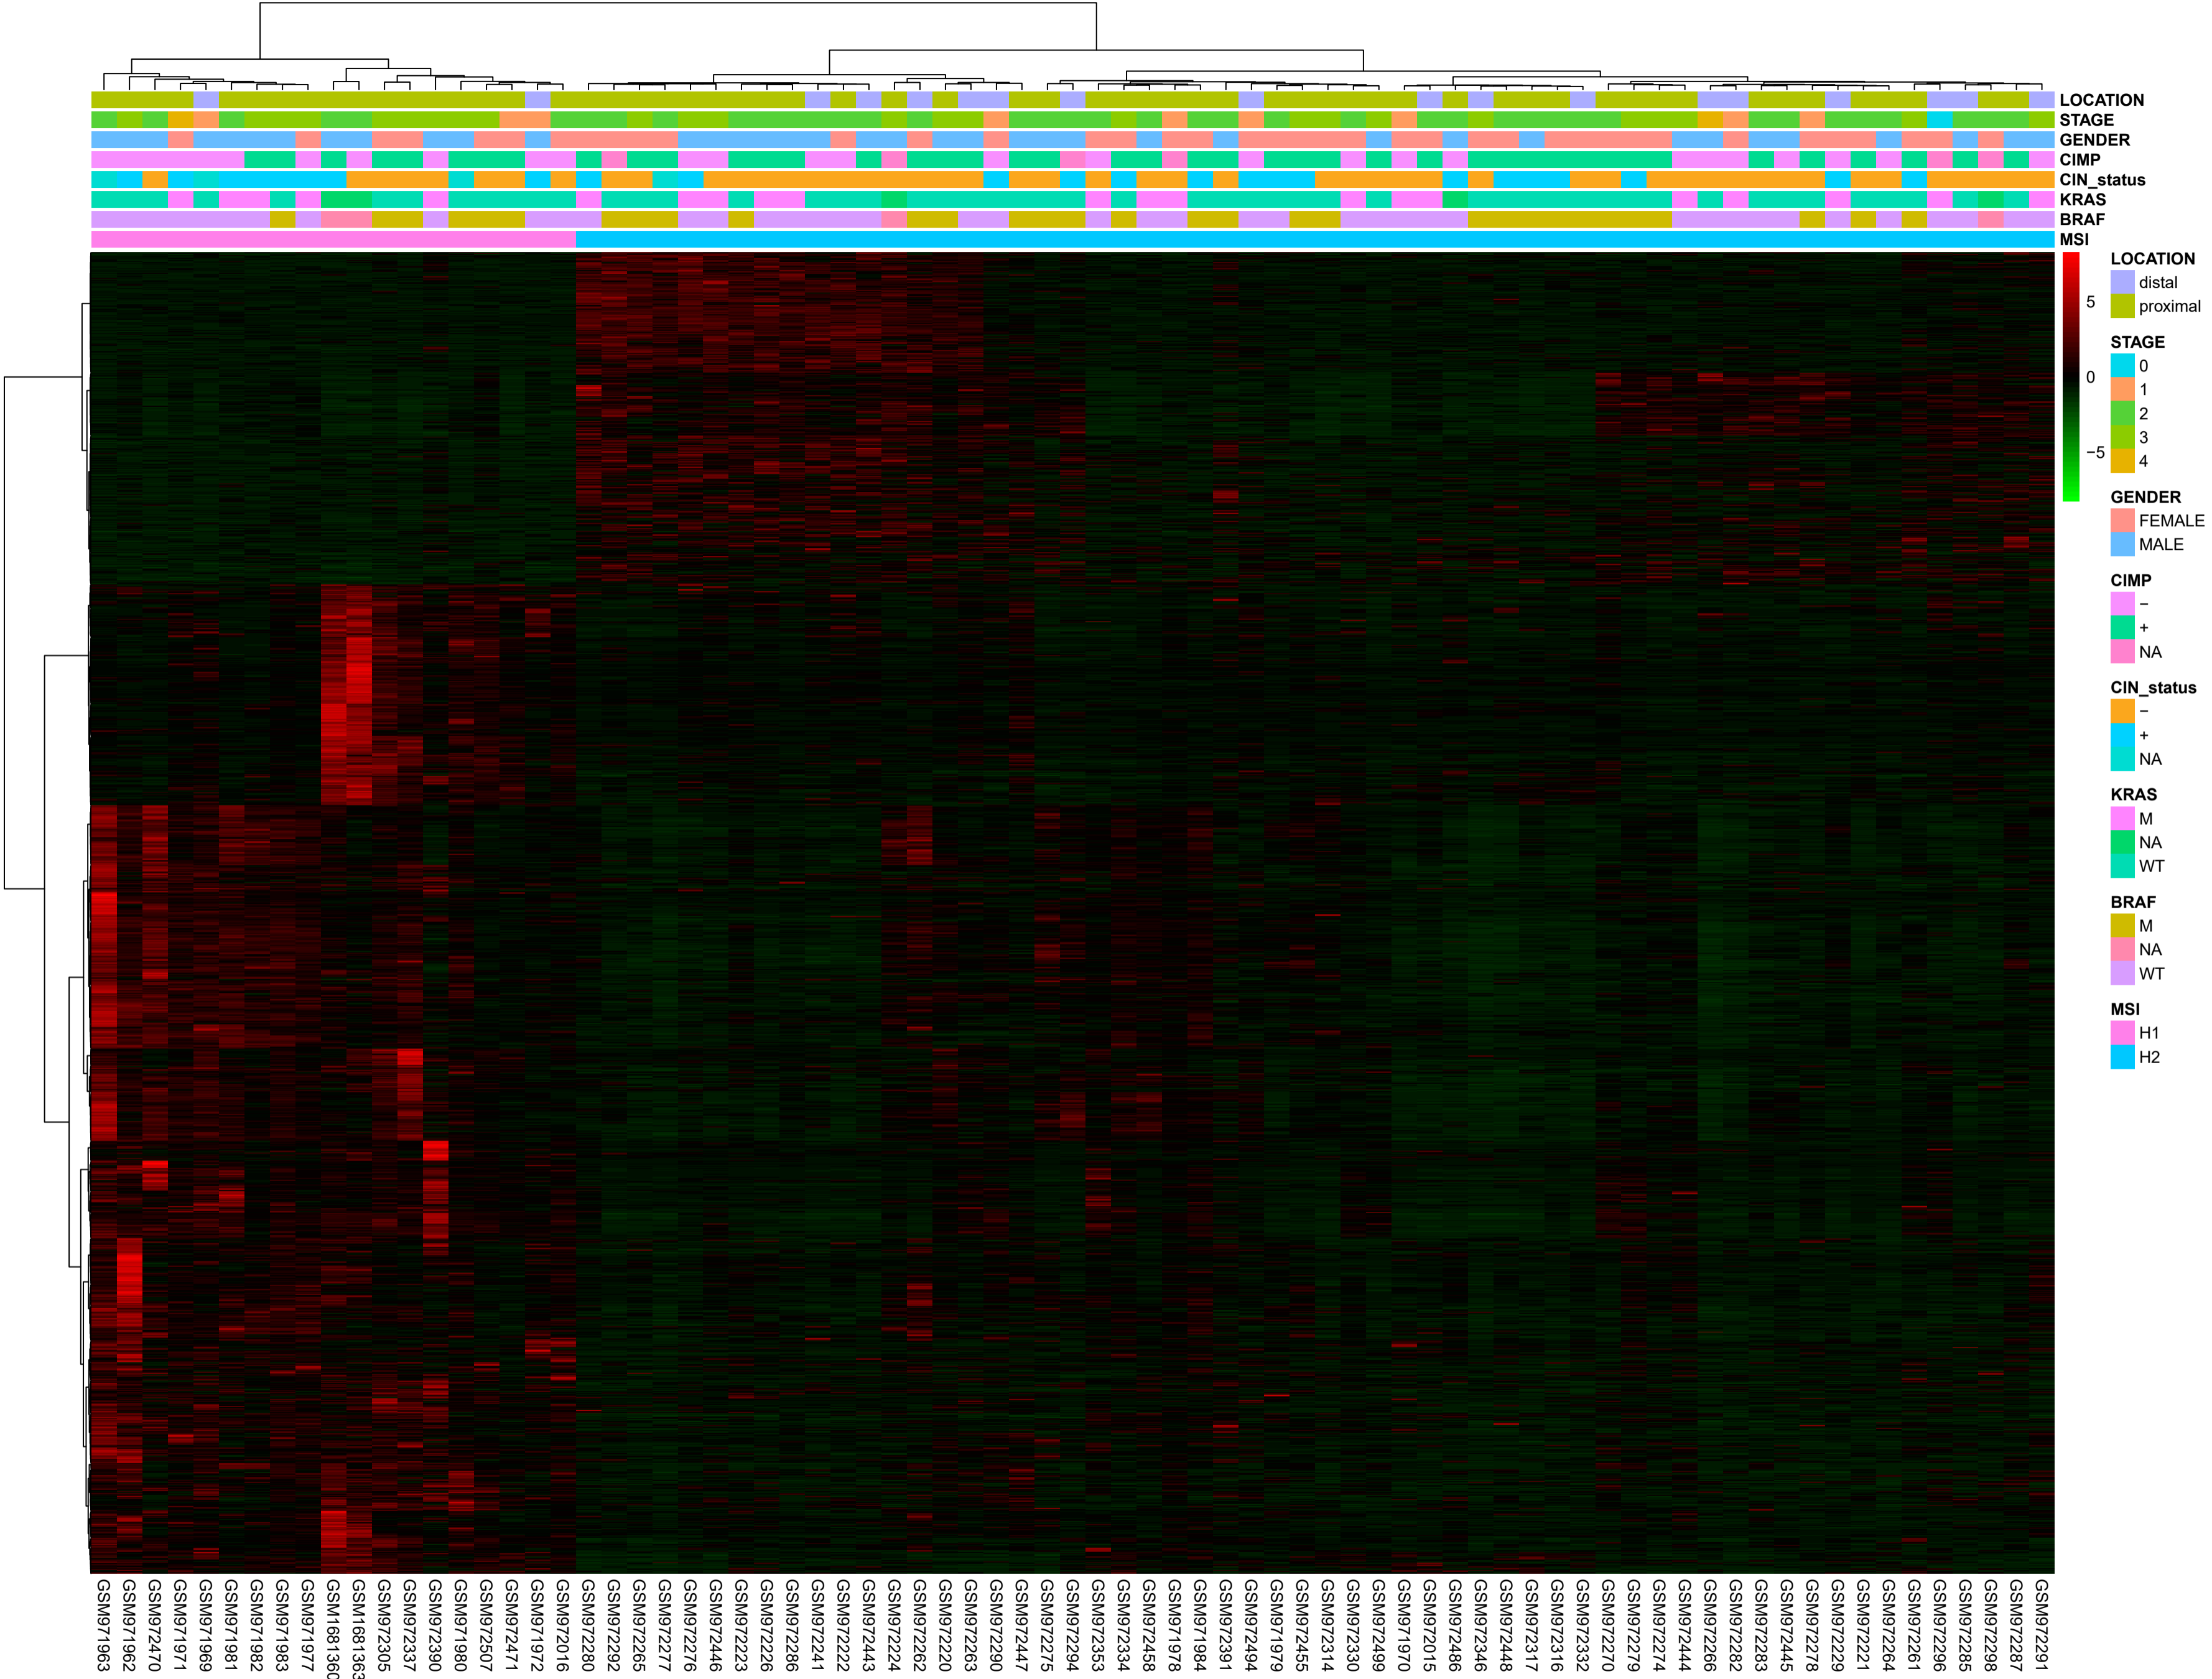

Figure S2 MSI-H CRC patients (GSE39582) fell into two gene expression-based subtypes. The association of clinicopathologic factors and MSI-H subtypes were shown on the top. Heatmap displays expression pattern of MSI-H subtypes.
