# Supplementary material for: Subtyping of microsatellite instability-high colorectal cancer
Source: PubMed Central journal article supplement (PMC6647262; doi:10.1186/s12964-019-0397-4), 2019-07-22
Supplement: 12964_2019_397_MOESM4_ESM.pdf [file 12964_2019_397_MOESM4_ESM.pdf]

rank = 2

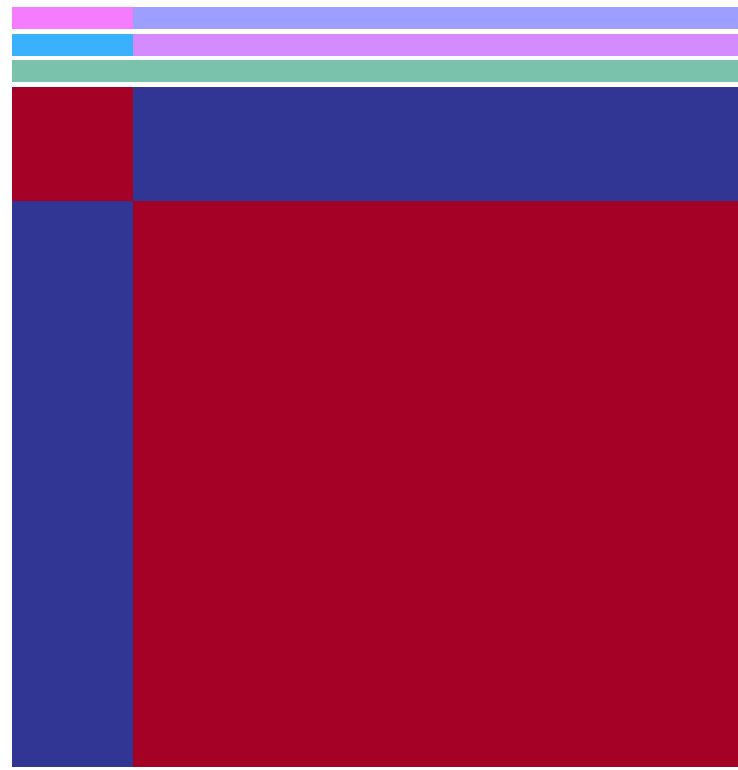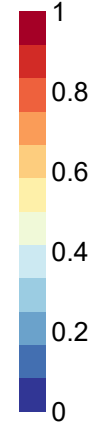

**basis**  
 1 (light blue)  
 2 (magenta)

**consensus**  
 1 (light blue)  
 2 (magenta)

**silhouette**  
 1 (green)  
 0 (light green)

rank = 3

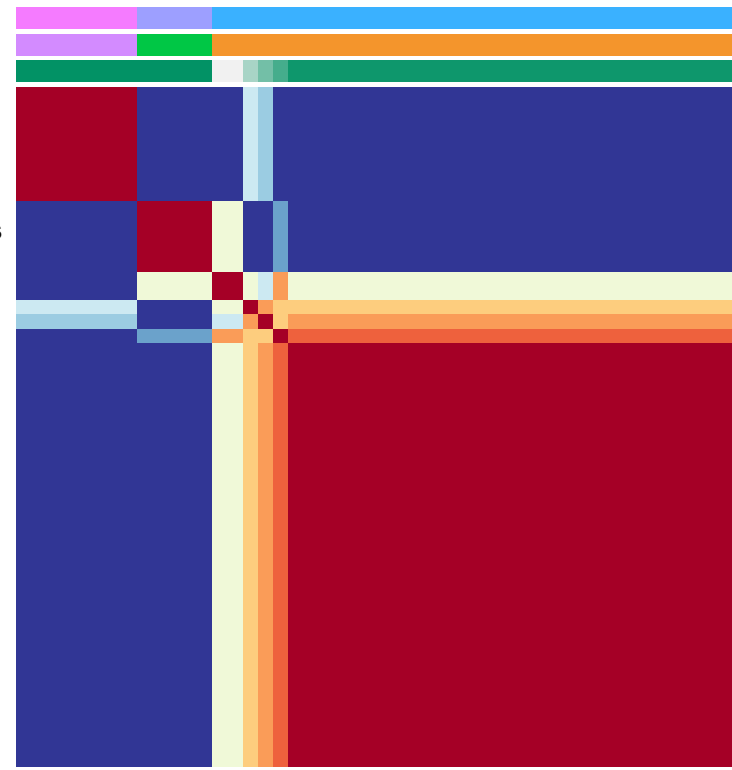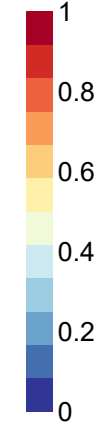

**basis**  
 1 (light blue)  
 2 (magenta)  
 3 (cyan)

**consensus**  
 1 (magenta)  
 2 (green)  
 3 (orange)

**silhouette**  
 1 (green)  
 0.04 (light green)

rank = 4

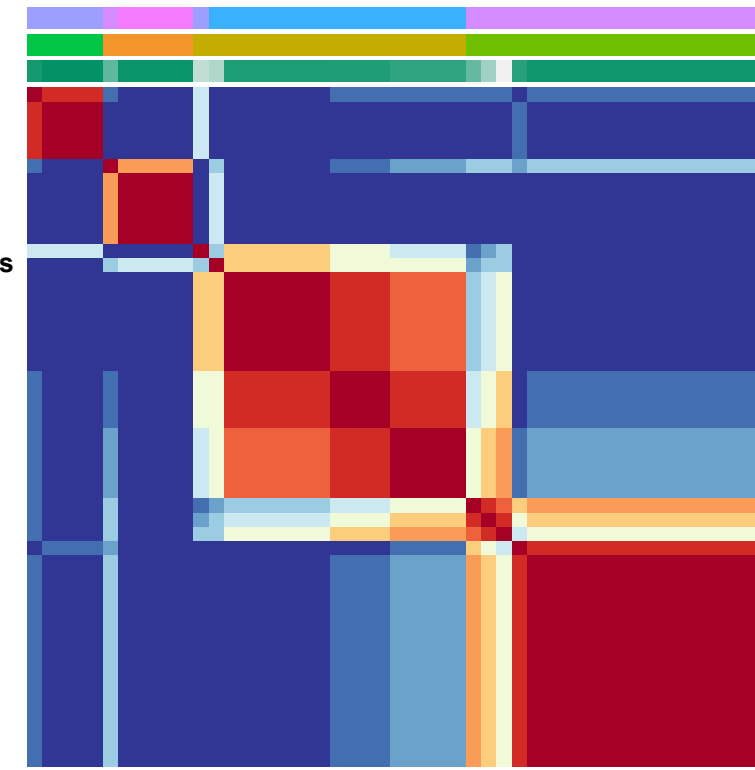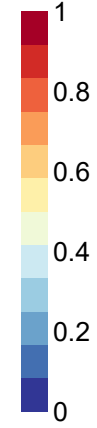

**basis**  
 1 (light blue)  
 2 (magenta)  
 3 (cyan)  
 4 (purple)

**consensus**  
 1 (green)  
 2 (orange)  
 3 (yellow-green)  
 4 (light green)

**silhouette**  
 1 (green)  
 -0.05 (light green)

rank = 5

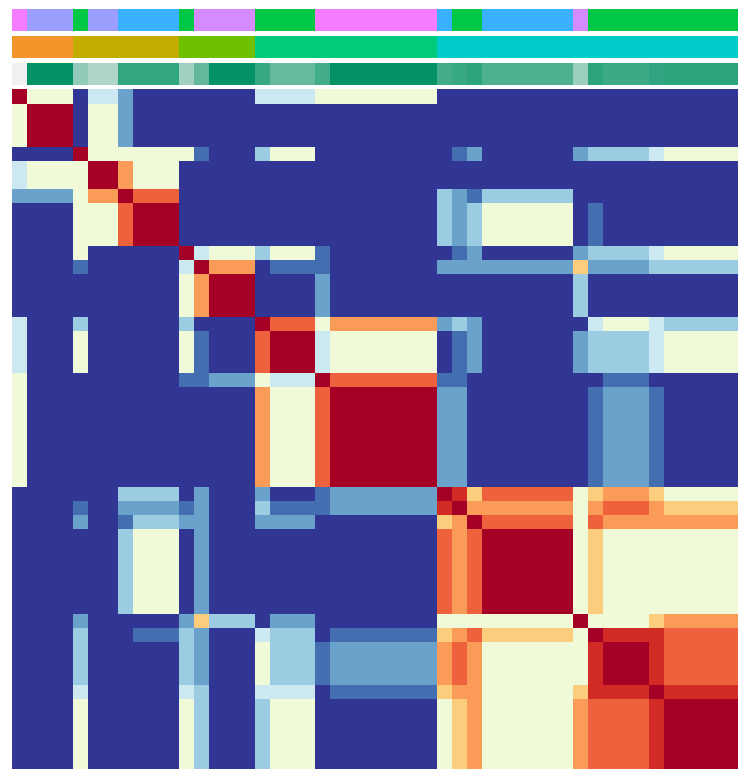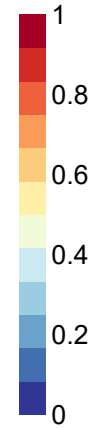

**basis**  
 1 (light blue)  
 2 (magenta)  
 3 (cyan)  
 4 (purple)  
 5 (green)

**consensus**  
 1 (orange)  
 2 (yellow-green)  
 3 (green)  
 4 (cyan)  
 5 (light blue)

**silhouette**  
 0.8 (green)  
 0.06 (light green)

rank = 6

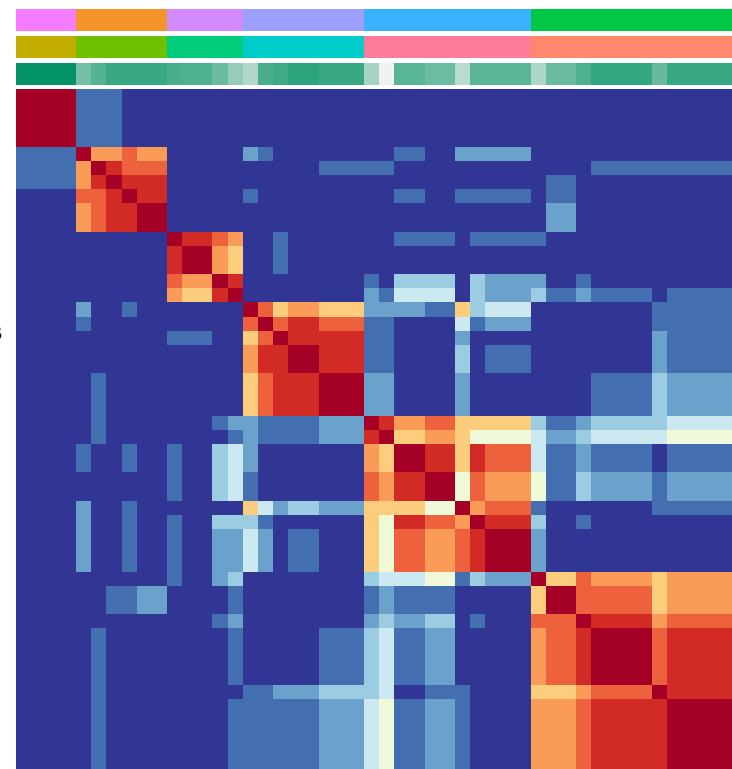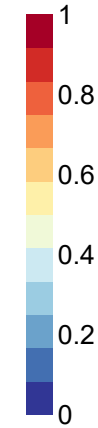

**basis**  
 1 (light blue)  
 2 (magenta)  
 3 (cyan)  
 4 (purple)  
 5 (green)  
 6 (orange)

**consensus**  
 1 (yellow-green)  
 2 (green)  
 3 (cyan)  
 4 (light blue)  
 5 (pink)  
 6 (orange)

**silhouette**  
 1 (green)  
 0.35 (light green)

Figure S3 Clustering of 48 MSI-H CRCs in TCGA by NMF. Correlation matrix heatmaps correspond to rank 2 to 6.
