# Supplementary material for: Subtyping of microsatellite instability-high colorectal cancer
Source: PubMed Central journal article supplement (PMC6647262; doi:10.1186/s12964-019-0397-4), 2019-07-22
Supplement: 12964_2019_397_MOESM5_ESM.pdf [file 12964_2019_397_MOESM5_ESM.pdf]

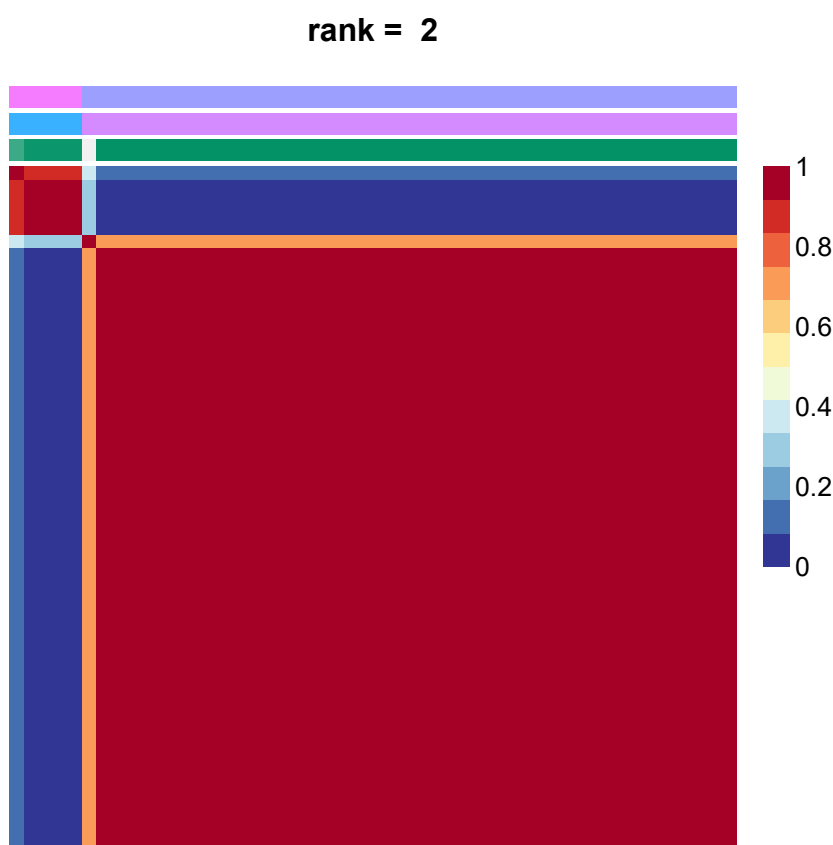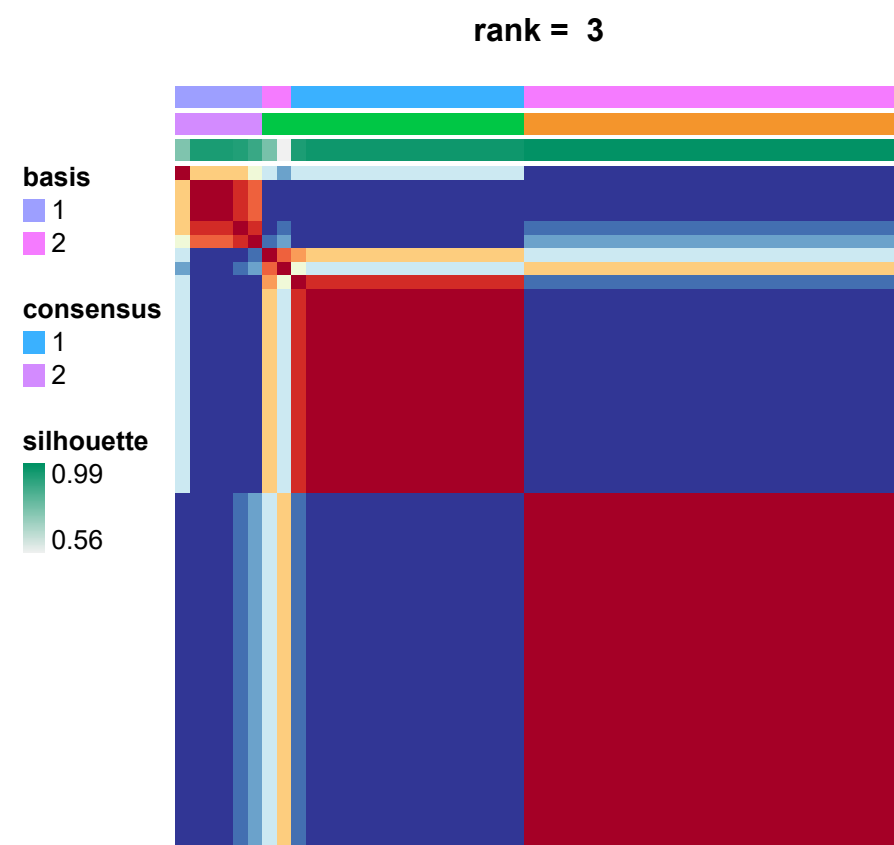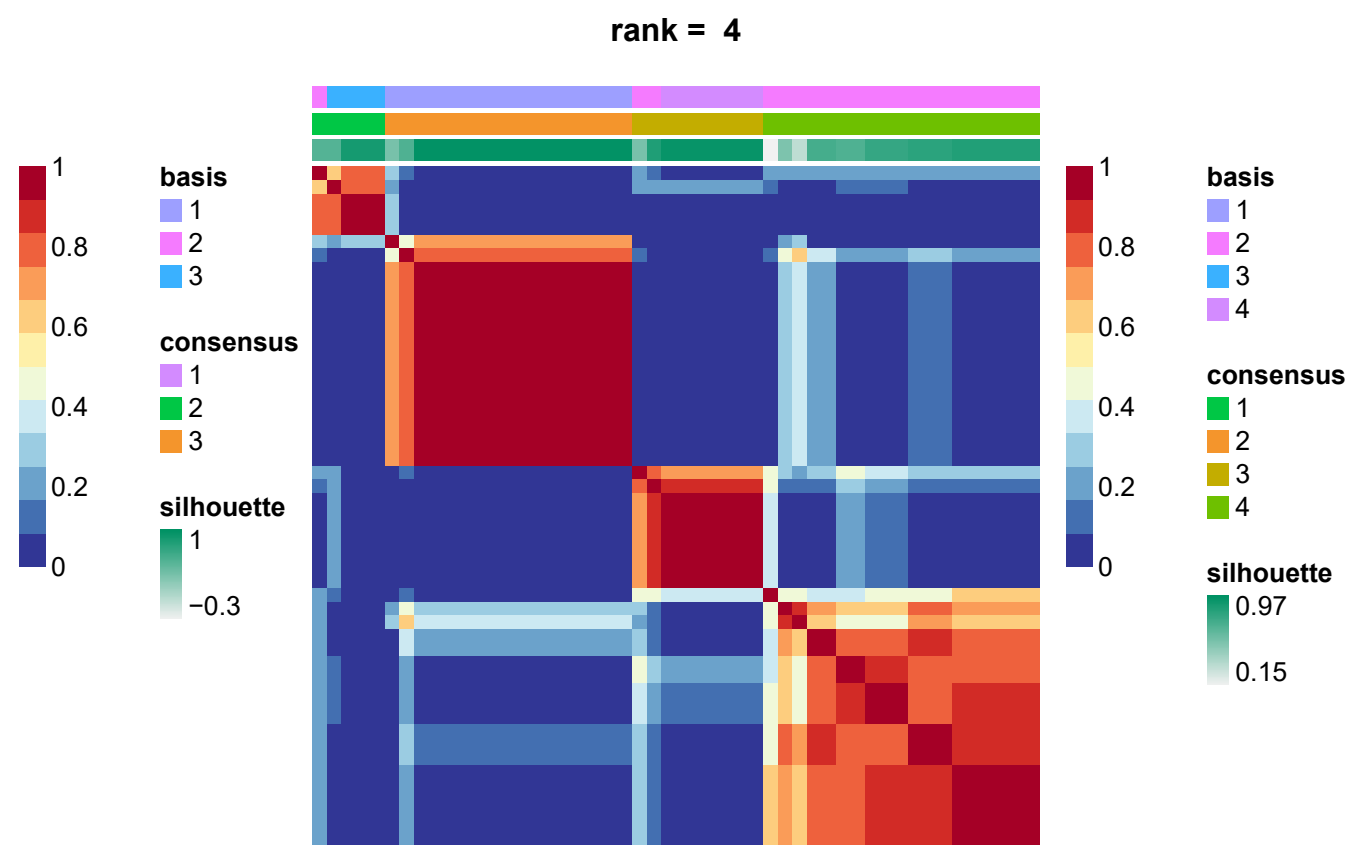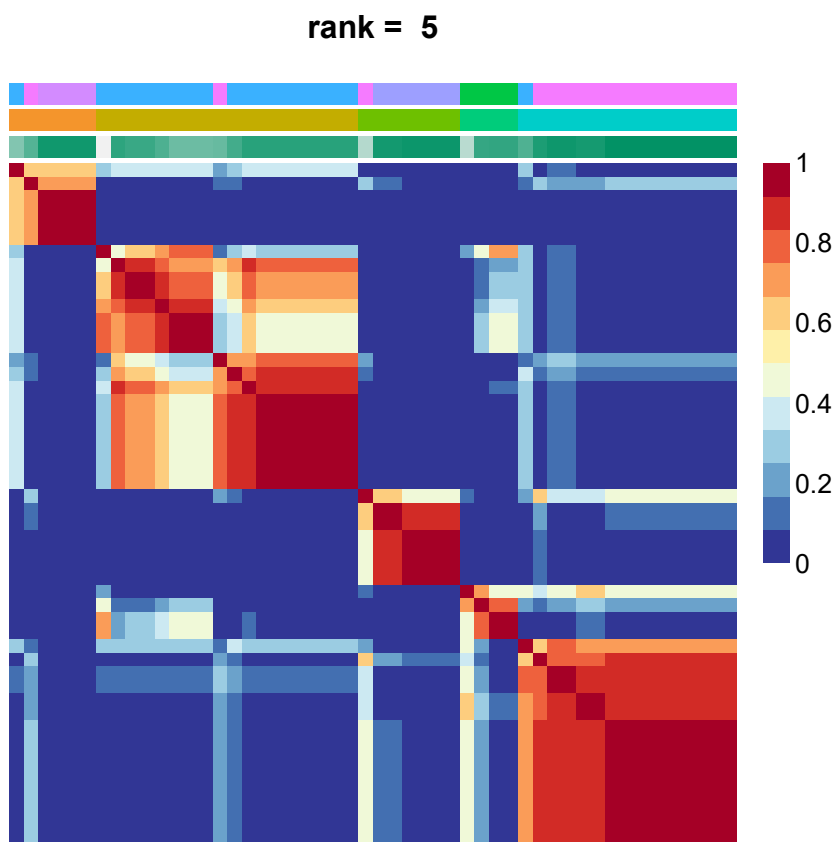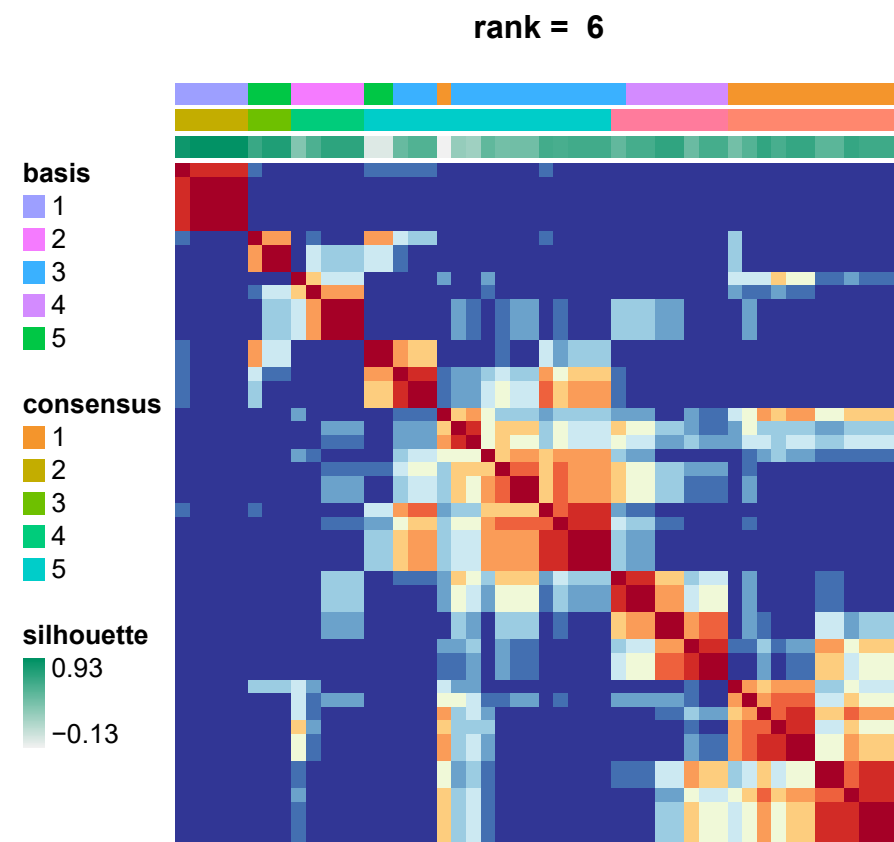

Figure S4 Clustering of 53 stage II MSI-H CRCs in GSE39582 by NMF. Correlation matrix heatmaps correspond to rank 2 to 6.
