# Supplementary material for: Subtyping of microsatellite instability-high colorectal cancer
Source: PubMed Central journal article supplement (PMC6647262; doi:10.1186/s12964-019-0397-4), 2019-07-22
Supplement: 12964_2019_397_MOESM9_ESM.pdf [file 12964_2019_397_MOESM9_ESM.pdf]

# CRC MSI-H subtyping

TCGA+GSE39582

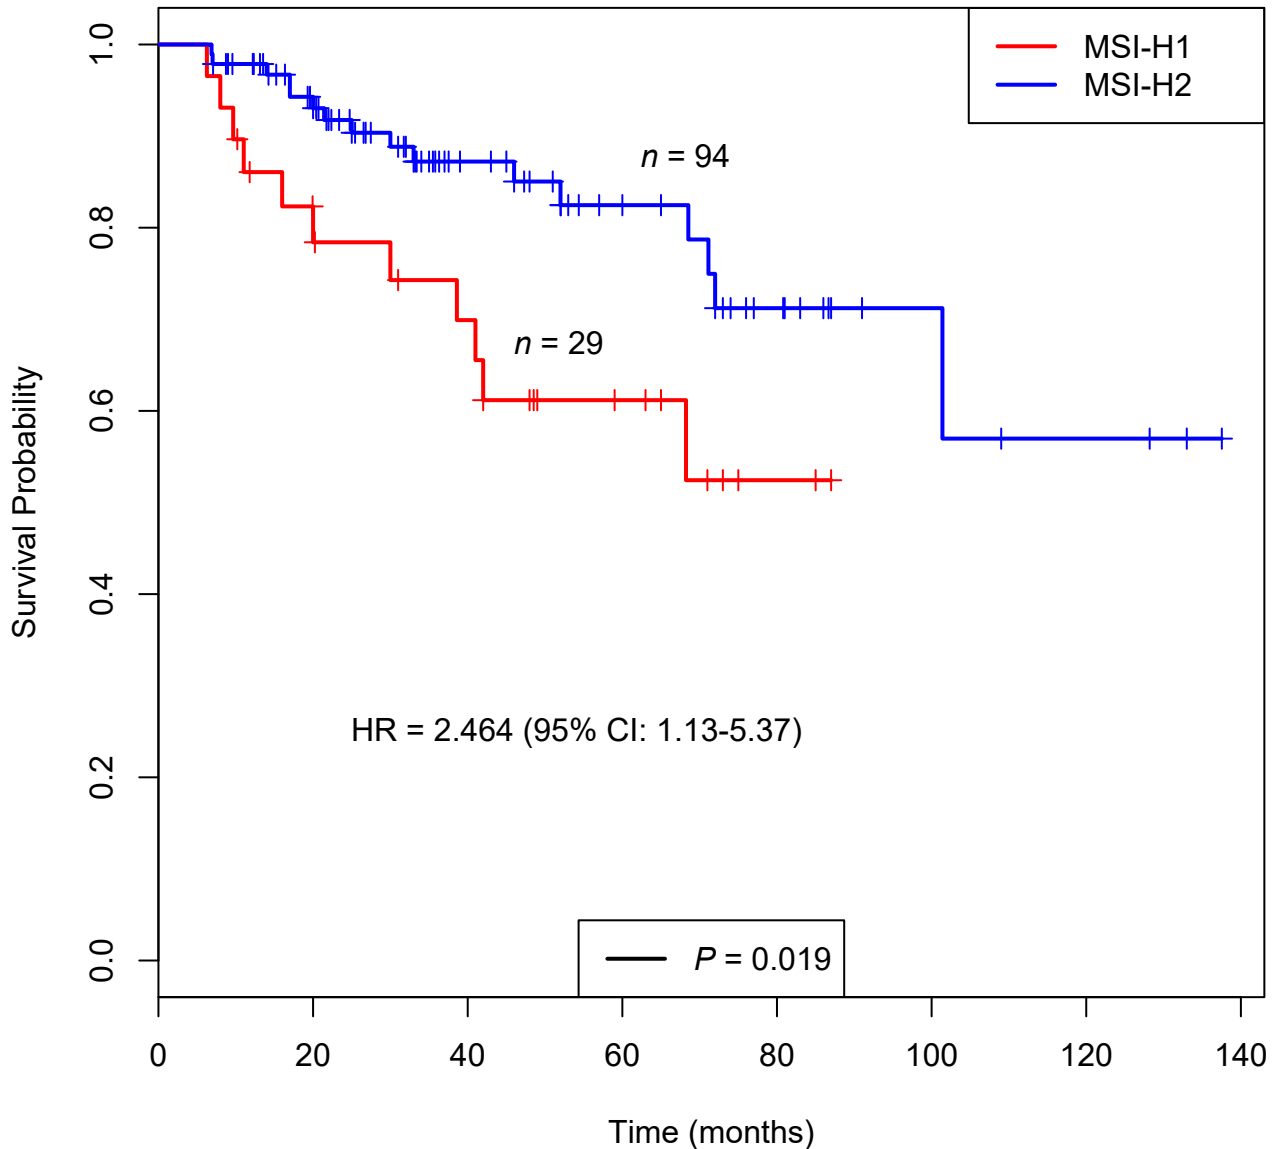

Figure S6 Survival status of MSI-H CRC subtypes. Kaplan-Meier curves showing OS according to MSI-H subtypes. Clearly, a better prognosis was observed for MSI-H2 than for MSI-H1. The HR shown on the graph is derived from univariable Cox proportional hazards model testing. Abbreviations: CI, confidence interval; HR, hazard ratio; **P**, P-value.
