# Supplementary material for: Subtyping of microsatellite instability-high colorectal cancer
Source: PubMed Central journal article supplement (PMC6647262; doi:10.1186/s12964-019-0397-4), 2019-07-22
Supplement: 12964_2019_397_MOESM11_ESM.pdf [file 12964_2019_397_MOESM11_ESM.pdf]

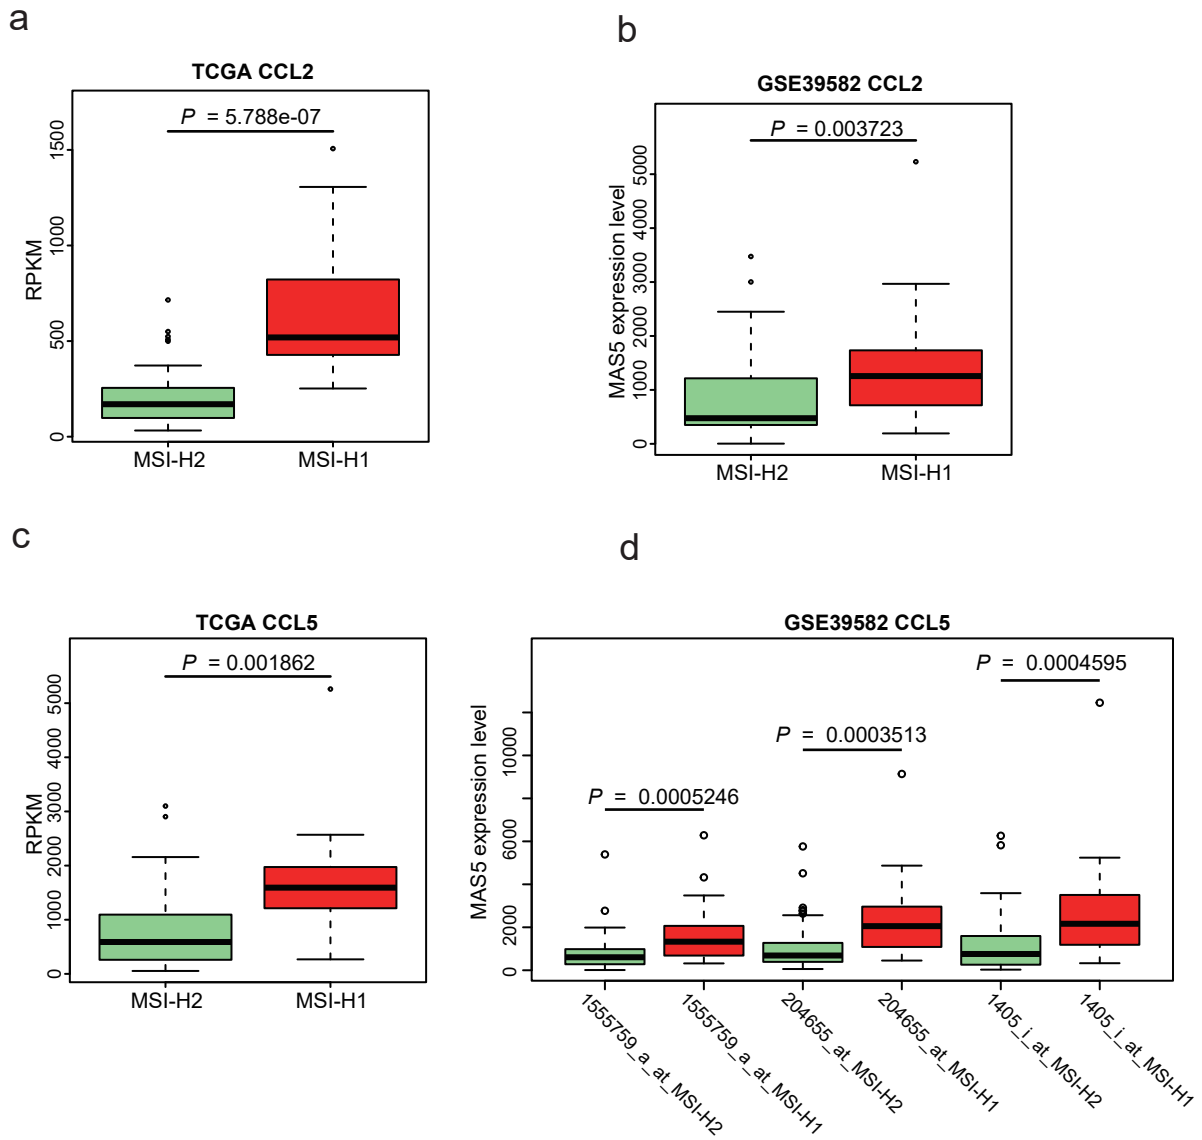

Figure S7 Boxplot distribution of *CCL2* and *CCL5* expression level between MSI-H1 and MSI-H2 by using TCGA and GSE39582 data.
